# Supplementary material for: Reactivity of a trinuclear ruthenium complex involving C–H activation and insertion of alkene
Source: Royal Society of Chemistry journal article supplement (doi:10.1039/c4nj01382d), 2014-11-12
Supplement: c4nj01382d3.pdf [file c4nj01382d3.pdf]

Table 1. Atomic coordinates ( $\times 10^4$ ) and equivalent isotropic displacement parameters ( $\text{\AA}^2 \times 10^3$ ) for **1**. U(eq) is defined as one third of the trace of the orthogonalized Uij tensor.

|       | x        | y        | z        | U(eq)  |
|-------|----------|----------|----------|--------|
| Br(1) | -1423(1) | 9962(1)  | 8287(1)  | 79(1)  |
| C(1)  | 2798(5)  | 6788(5)  | 4995(4)  | 45(1)  |
| C(2)  | 3590(6)  | 6280(6)  | 4268(5)  | 59(2)  |
| C(3)  | 4195(6)  | 7046(7)  | 3685(5)  | 69(2)  |
| C(4)  | 4086(6)  | 8314(7)  | 3814(5)  | 67(2)  |
| C(5)  | 3391(6)  | 8869(6)  | 4532(5)  | 55(1)  |
| C(6)  | 2707(5)  | 8099(5)  | 5152(4)  | 42(1)  |
| C(7)  | 1828(4)  | 8295(4)  | 5958(4)  | 38(1)  |
| C(8)  | 1343(5)  | 7111(4)  | 6216(4)  | 39(1)  |
| C(9)  | 2020(5)  | 6208(4)  | 5689(4)  | 44(1)  |
| C(10) | 1310(5)  | 9407(4)  | 6392(4)  | 40(1)  |
| C(11) | 1645(6)  | 10603(5) | 6161(5)  | 53(1)  |
| C(12) | 1081(7)  | 11581(5) | 6589(6)  | 64(2)  |
| C(13) | 146(6)   | 11375(5) | 7225(5)  | 60(2)  |
| C(14) | -122(5)  | 10182(5) | 7425(4)  | 47(1)  |
| C(15) | -1587(5) | 7108(5)  | 6121(5)  | 48(1)  |
| C(16) | -709(6)  | 7359(6)  | 8686(5)  | 57(1)  |
| C(17) | 9(5)     | 5499(5)  | 7336(5)  | 51(1)  |
| C(18) | 2531(5)  | 8879(6)  | 9225(4)  | 50(1)  |
| C(19) | 1984(7)  | 6651(7)  | 10200(6) | 72(2)  |
| C(20) | 4675(6)  | 7363(6)  | 9983(5)  | 62(2)  |
| C(21) | 2933(6)  | 5434(6)  | 8374(5)  | 62(2)  |
| C(22) | 5159(6)  | 6594(6)  | 7461(5)  | 59(2)  |
| C(23) | 4715(5)  | 8966(5)  | 7853(4)  | 48(1)  |
| N(1)  | 426(4)   | 9193(3)  | 7057(3)  | 37(1)  |
| O(1)  | -1155(5) | 7302(5)  | 9475(4)  | 86(2)  |
| O(2)  | -2600(4) | 7019(5)  | 5392(4)  | 83(1)  |
| O(3)  | -92(5)   | 4433(4)  | 7243(4)  | 73(1)  |
| O(4)  | 1559(6)  | 6356(6)  | 10943(5) | 114(2) |
| O(5)  | 3053(6)  | 4451(4)  | 8042(5)  | 94(2)  |
| O(6)  | 5764(5)  | 7532(5)  | 10560(5) | 100(2) |
| O(7)  | 2460(4)  | 9923(4)  | 9373(3)  | 66(1)  |
| O(8)  | 5309(4)  | 9864(4)  | 8364(4)  | 69(1)  |
| O(9)  | 6075(5)  | 6012(5)  | 7726(5)  | 93(2)  |
| Ru(1) | 93(1)    | 7206(1)  | 7329(1)  | 38(1)  |
| Ru(2) | 3665(1)  | 7514(1)  | 7003(1)  | 39(1)  |
| Ru(3) | 2784(1)  | 7122(1)  | 9003(1)  | 44(1)  |

Table 2. Atomic coordinates ( $\times 10^4$ ) and equivalent isotropic displacement parameters ( $\text{\AA}^2 \times 10^3$ ) for **2**.  $U(\text{eq})$  is defined as one third of the trace of the orthogonalized  $U_{ij}$  tensor.

|       | x        | y        | z       | $U(\text{eq})$ |
|-------|----------|----------|---------|----------------|
| Br(1) | 8451(1)  | 2795(1)  | -385(1) | 71(1)          |
| C(1)  | 8605(2)  | 6336(5)  | 1215(2) | 41(1)          |
| C(2)  | 8728(2)  | 7271(5)  | 1674(2) | 42(1)          |
| C(3)  | 8185(2)  | 7931(5)  | 1576(2) | 47(1)          |
| C(4)  | 8071(2)  | 8948(5)  | 1893(2) | 55(1)          |
| C(5)  | 7498(3)  | 9419(6)  | 1691(3) | 66(2)          |
| C(6)  | 7027(3)  | 8861(6)  | 1173(3) | 66(2)          |
| C(7)  | 7106(2)  | 7847(6)  | 866(2)  | 57(1)          |
| C(8)  | 7699(2)  | 7343(5)  | 1053(2) | 48(1)          |
| C(9)  | 7963(2)  | 6312(5)  | 854(2)  | 41(1)          |
| C(10) | 7715(2)  | 5392(5)  | 343(2)  | 43(1)          |
| C(11) | 7111(2)  | 5340(6)  | -71(2)  | 59(2)          |
| C(12) | 6918(3)  | 4477(6)  | -546(3) | 65(2)          |
| C(13) | 7317(2)  | 3688(6)  | -621(2) | 58(1)          |
| C(14) | 7911(2)  | 3796(5)  | -209(2) | 50(1)          |
| C(15) | 9482(2)  | 3150(5)  | 994(2)  | 47(1)          |
| C(16) | 9913(3)  | 2707(6)  | 737(3)  | 60(2)          |
| C(17) | 10040(2) | 1356(6)  | 952(2)  | 57(1)          |
| C(18) | 10387(3) | 454(7)   | 828(3)  | 73(2)          |
| C(19) | 10440(3) | -732(7)  | 1069(4) | 89(2)          |
| C(20) | 10155(3) | -1030(7) | 1442(3) | 79(2)          |
| C(21) | 9806(3)  | -144(6)  | 1577(3) | 63(2)          |
| C(22) | 9752(2)  | 1071(5)  | 1332(2) | 49(1)          |
| C(23) | 9433(2)  | 2225(5)  | 1374(2) | 43(1)          |
| C(24) | 9110(2)  | 2496(5)  | 1752(2) | 37(1)          |
| C(25) | 9065(2)  | 1692(5)  | 2185(2) | 48(1)          |
| C(26) | 8746(2)  | 2053(5)  | 2518(2) | 53(1)          |
| C(27) | 8476(2)  | 3199(5)  | 2405(2) | 48(1)          |
| C(28) | 8534(2)  | 4062(5)  | 1978(2) | 37(1)          |
| C(29) | 8455(2)  | 6043(5)  | 2717(2) | 49(1)          |
| C(30) | 7426(2)  | 5058(6)  | 1744(2) | 55(1)          |
| C(31) | 9277(2)  | 5739(6)  | 462(2)  | 62(2)          |
| C(32) | 9802(2)  | 5299(5)  | 1656(2) | 47(1)          |
| N(1)  | 8852(2)  | 3684(4)  | 1657(2) | 37(1)          |
| N(2)  | 8128(2)  | 4580(4)  | 279(2)  | 41(1)          |
| O(1)  | 9400(2)  | 6248(6)  | 114(2)  | 103(2)         |
| O(2)  | 10254(2) | 5590(5)  | 2033(2) | 81(1)          |
| O(3)  | 6981(2)  | 4628(5)  | 1669(2) | 92(2)          |
| O(4)  | 8656(2)  | 6203(5)  | 3238(2) | 78(1)          |

|       |         |         |         |       |
|-------|---------|---------|---------|-------|
| Ru(1) | 8148(1) | 5833(1) | 1834(1) | 38(1) |
| Ru(2) | 9072(1) | 4859(1) | 1032(1) | 38(1) |

Table 3. Atomic coordinates ( $\times 10^4$ ) and equivalent isotropic displacement parameters ( $\text{\AA}^2 \times 10^3$ ) for **3**.  $U(\text{eq})$  is defined as one third of the trace of the orthogonalized  $U_{ij}$  tensor.

|       | x        | y        | z       | $U(\text{eq})$ |
|-------|----------|----------|---------|----------------|
| Br(1) | 10394(1) | 450(1)   | 1258(1) | 63(1)          |
| C(1)  | 9708(1)  | 2158(6)  | 1187(3) | 38(1)          |
| C(2)  | 9766(2)  | 4341(7)  | 1268(3) | 46(1)          |
| C(3)  | 9264(2)  | 5517(6)  | 1248(3) | 43(1)          |
| C(4)  | 8744(1)  | 4464(6)  | 1135(2) | 34(1)          |
| C(5)  | 8735(1)  | 2254(5)  | 1034(2) | 28(1)          |
| C(6)  | 8204(1)  | 1011(5)  | 834(2)  | 25(1)          |
| C(7)  | 8173(1)  | -747(5)  | 309(2)  | 28(1)          |
| C(8)  | 7591(1)  | -1626(5) | 242(2)  | 26(1)          |
| C(9)  | 7253(1)  | -162(5)  | 821(2)  | 27(1)          |
| C(10) | 6684(1)  | -160(5)  | 1080(2) | 32(1)          |
| C(11) | 6491(2)  | 1449(6)  | 1631(2) | 39(1)          |
| C(12) | 6856(2)  | 3053(6)  | 1973(2) | 39(1)          |
| C(13) | 7428(1)  | 3049(6)  | 1740(2) | 36(1)          |
| C(14) | 7623(1)  | 1469(5)  | 1172(2) | 26(1)          |
| N(1)  | 9228(1)  | 1086(4)  | 1066(2) | 32(1)          |

Table 4. Atomic coordinates ( $\times 10^4$ ) and equivalent isotropic displacement parameters ( $\text{\AA}^2 \times 10^3$ ) for **4**.  $U(\text{eq})$  is defined as one third of the trace of the orthogonalized  $U_{ij}$  tensor.

|       | x        | y       | z       | $U(\text{eq})$ |
|-------|----------|---------|---------|----------------|
| Ru(1) | 7231(1)  | 4512(1) | 7918(1) | 30(1)          |
| Ru(2) | 3828(1)  | 2410(1) | 7206(1) | 33(1)          |
| Ru(3) | 9167(1)  | 7468(1) | 8641(1) | 38(1)          |
| Br(1) | 1770(1)  | 1611(1) | 5006(1) | 67(1)          |
| N(1)  | 3458(7)  | 3842(5) | 6284(3) | 34(1)          |
| O(1)  | 9803(8)  | 2939(6) | 8824(3) | 62(2)          |
| O(2)  | 9355(8)  | 4170(6) | 6521(3) | 67(2)          |
| O(3)  | 4509(9)  | 1060(6) | 8727(3) | 68(2)          |
| O(4)  | 5262(9)  | 184(7)  | 6169(4) | 82(2)          |
| O(5)  | -462(8)  | 797(6)  | 6961(4) | 73(2)          |
| O(6)  | 11822(9) | 8003(7) | 7408(4) | 78(2)          |
| O(7)  | 12330(8) | 6569(8) | 9670(4) | 85(2)          |

|       |           |         |         |       |
|-------|-----------|---------|---------|-------|
| C(1)  | 4746(8)   | 5500(7) | 7480(4) | 33(2) |
| C(2)  | 4195(8)   | 4308(7) | 7941(4) | 32(2) |
| C(3)  | 5073(9)   | 4811(7) | 8765(4) | 38(2) |
| C(4)  | 5937(9)   | 6345(7) | 8860(4) | 38(2) |
| C(5)  | 5751(8)   | 6796(7) | 8054(4) | 37(2) |
| C(6)  | 6670(9)   | 8242(7) | 7981(5) | 45(2) |
| C(7)  | 7594(10)  | 9236(8) | 8689(5) | 51(2) |
| C(8)  | 7739(10)  | 8802(9) | 9450(5) | 57(2) |
| C(9)  | 7007(9)   | 7357(8) | 9538(4) | 45(2) |
| C(10) | 4061(9)   | 5276(7) | 6620(4) | 33(2) |
| C(11) | 3868(10)  | 6364(7) | 6153(4) | 42(2) |
| C(12) | 3045(10)  | 5999(8) | 5339(4) | 49(2) |
| C(13) | 2407(10)  | 4573(8) | 5002(4) | 48(2) |
| C(14) | 2670(9)   | 3563(7) | 5503(4) | 40(2) |
| C(15) | 8822(9)   | 3557(7) | 8479(4) | 39(2) |
| C(16) | 8565(9)   | 4334(7) | 7059(4) | 39(2) |
| C(17) | 4303(10)  | 1541(7) | 8140(5) | 44(2) |
| C(18) | 4683(11)  | 993(8)  | 6532(5) | 49(2) |
| C(19) | 1098(11)  | 1401(8) | 7004(4) | 47(2) |
| C(20) | 10814(10) | 7800(8) | 7882(5) | 48(2) |
| C(21) | 11116(11) | 6915(9) | 9274(5) | 54(2) |

Table 5. Atomic coordinates ( $\times 10^4$ ) and equivalent isotropic displacement parameters ( $\text{\AA}^2 \times 10^3$ ) for **5**.  $U(\text{eq})$  is defined as one third of the trace of the orthogonalized  $U_{ij}$  tensor.

|       | x        | y       | z        | $U(\text{eq})$ |
|-------|----------|---------|----------|----------------|
| C(1)  | 7032(4)  | 1024(3) | 4292(4)  | 49(1)          |
| C(2)  | 6807(4)  | -37(3)  | 4337(5)  | 53(1)          |
| C(3)  | 7612(4)  | -515(2) | 3408(5)  | 45(1)          |
| C(4)  | 8536(3)  | 227(2)  | 2952(4)  | 37(1)          |
| C(5)  | 9656(3)  | 170(3)  | 2190(4)  | 46(1)          |
| C(6)  | 10353(4) | 1034(3) | 1947(5)  | 57(1)          |
| C(7)  | 9957(4)  | 1984(3) | 2430(4)  | 57(1)          |
| C(8)  | 8865(4)  | 2087(3) | 3152(5)  | 51(1)          |
| C(9)  | 8149(3)  | 1202(2) | 3469(4)  | 38(1)          |
| C(10) | 5987(4)  | 435(2)  | -912(4)  | 40(1)          |
| C(11) | 4457(4)  | 1661(3) | 759(5)   | 56(1)          |
| O(1)  | 3655(4)  | 2354(2) | 332(6)   | 102(1)         |
| O(2)  | 6782(4)  | 821(3)  | -1553(4) | 69(1)          |
| Ru(1) | 5779(1)  | 548(1)  | 1515(1)  | 32(1)          |

Table 6. Atomic coordinates ( $\times 10^4$ ) and equivalent isotropic displacement parameters ( $\text{\AA}^2 \times 10^3$ ) for **6**.  $U(\text{eq})$  is defined as one third of the trace of the orthogonalized  $U_{ij}$  tensor.

|       | x        | y        | z       | $U(\text{eq})$ |
|-------|----------|----------|---------|----------------|
| Ru(1) | 8727(1)  | 8200(1)  | 7309(1) | 34(1)          |
| Ru(2) | 8075(1)  | 6106(1)  | 6922(1) | 33(1)          |
| Br(1) | 6508(1)  | 4777(1)  | 4682(1) | 73(1)          |
| N(1)  | 6667(4)  | 6656(4)  | 5637(3) | 36(1)          |
| O(1)  | 10989(4) | 8161(4)  | 8887(4) | 72(2)          |
| O(2)  | 9635(5)  | 8235(5)  | 5841(4) | 79(2)          |
| O(3)  | 9345(5)  | 5753(5)  | 5694(4) | 75(2)          |
| O(4)  | 10026(5) | 5762(4)  | 8755(4) | 69(2)          |
| O(5)  | 7406(5)  | 3851(4)  | 6953(4) | 62(1)          |
| C(1)  | 6099(6)  | 6149(5)  | 4818(4) | 43(2)          |
| C(2)  | 5257(6)  | 6564(6)  | 4062(5) | 53(2)          |
| C(3)  | 4933(5)  | 7555(6)  | 4117(5) | 51(2)          |
| C(4)  | 5480(5)  | 8105(5)  | 4933(5) | 43(2)          |
| C(5)  | 6343(5)  | 7665(5)  | 5683(4) | 35(1)          |
| C(6)  | 6940(5)  | 8212(4)  | 6582(4) | 35(1)          |
| C(7)  | 7207(5)  | 7713(5)  | 7487(4) | 34(1)          |
| C(8)  | 7769(5)  | 8464(5)  | 8180(4) | 39(2)          |
| C(9)  | 7747(5)  | 9454(5)  | 7736(4) | 40(2)          |
| C(10) | 7220(5)  | 9308(4)  | 6742(4) | 37(1)          |
| C(11) | 7103(6)  | 10160(5) | 6123(5) | 43(2)          |
| C(12) | 7488(6)  | 11116(5) | 6526(6) | 54(2)          |
| C(13) | 7990(6)  | 11276(5) | 7498(5) | 52(2)          |
| C(14) | 8125(6)  | 10460(5) | 8113(5) | 49(2)          |
| C(15) | 7036(5)  | 6615(4)  | 7603(4) | 35(1)          |
| C(16) | 7282(6)  | 6291(5)  | 8612(4) | 43(2)          |
| C(17) | 6994(6)  | 5172(5)  | 8698(4) | 41(2)          |
| C(18) | 7791(6)  | 4432(6)  | 9121(5) | 57(2)          |
| C(19) | 7558(9)  | 3403(6)  | 9173(6) | 71(2)          |
| C(20) | 6506(11) | 3093(6)  | 8820(7) | 85(3)          |
| C(21) | 5671(8)  | 3809(7)  | 8383(6) | 72(3)          |
| C(22) | 5928(7)  | 4853(5)  | 8330(5) | 51(2)          |
| C(23) | 10128(6) | 8168(5)  | 8262(5) | 48(2)          |
| C(24) | 9288(6)  | 8216(5)  | 6393(5) | 52(2)          |
| C(25) | 8919(6)  | 5907(5)  | 6169(5) | 46(2)          |
| C(26) | 9299(6)  | 5912(5)  | 8068(5) | 42(2)          |
| C(27) | 7608(6)  | 4700(5)  | 6904(4) | 41(2)          |
